# Supplementary material for: Theoretical investigation of CO2 capture in the MIL-88 series: effects of organic linker modification
Source: Royal Society of Chemistry journal article supplement (doi:10.1039/d3ra01588b), 2023-01-01
Supplement: d3ra01588b1.pdf [file d3ra01588b1.pdf]

## Theoretical investigation of CO<sub>2</sub> capture in MIL-88 series: Effects of organic linker modification

Nguyen Thi Xuan Huynh,<sup>a</sup> Ong Kim Le,<sup>b,c</sup> Tran Phuong Dung,<sup>c,d</sup> Viorel Chihaiia<sup>e</sup> and Do Ngoc Son<sup>b,c\*</sup>

<sup>a</sup>Faculty of Natural Sciences, Quy Nhon University, 170 An Duong Vuong, Quy Nhon City, Binh Dinh Province, Vietnam

<sup>b</sup>Ho Chi Minh City University of Technology (HCMUT), 268 Ly Thuong Kiet Street, District 10, Ho Chi Minh City, Vietnam

<sup>c</sup>Vietnam National University Ho Chi Minh City, Linh Trung Ward, Ho Chi Minh City, Vietnam

<sup>d</sup>Department of Chemistry, University of Science, Ho Chi Minh City, Vietnam

<sup>e</sup>Institute of Physical Chemistry “Ilie Murgulescu” of the Romanian Academy, Splaiul Independentei 202, Sector 6, 060021 Bucharest, Romania

Corresponding Author: [dnson@hcmut.edu.vn](mailto:dnson@hcmut.edu.vn)

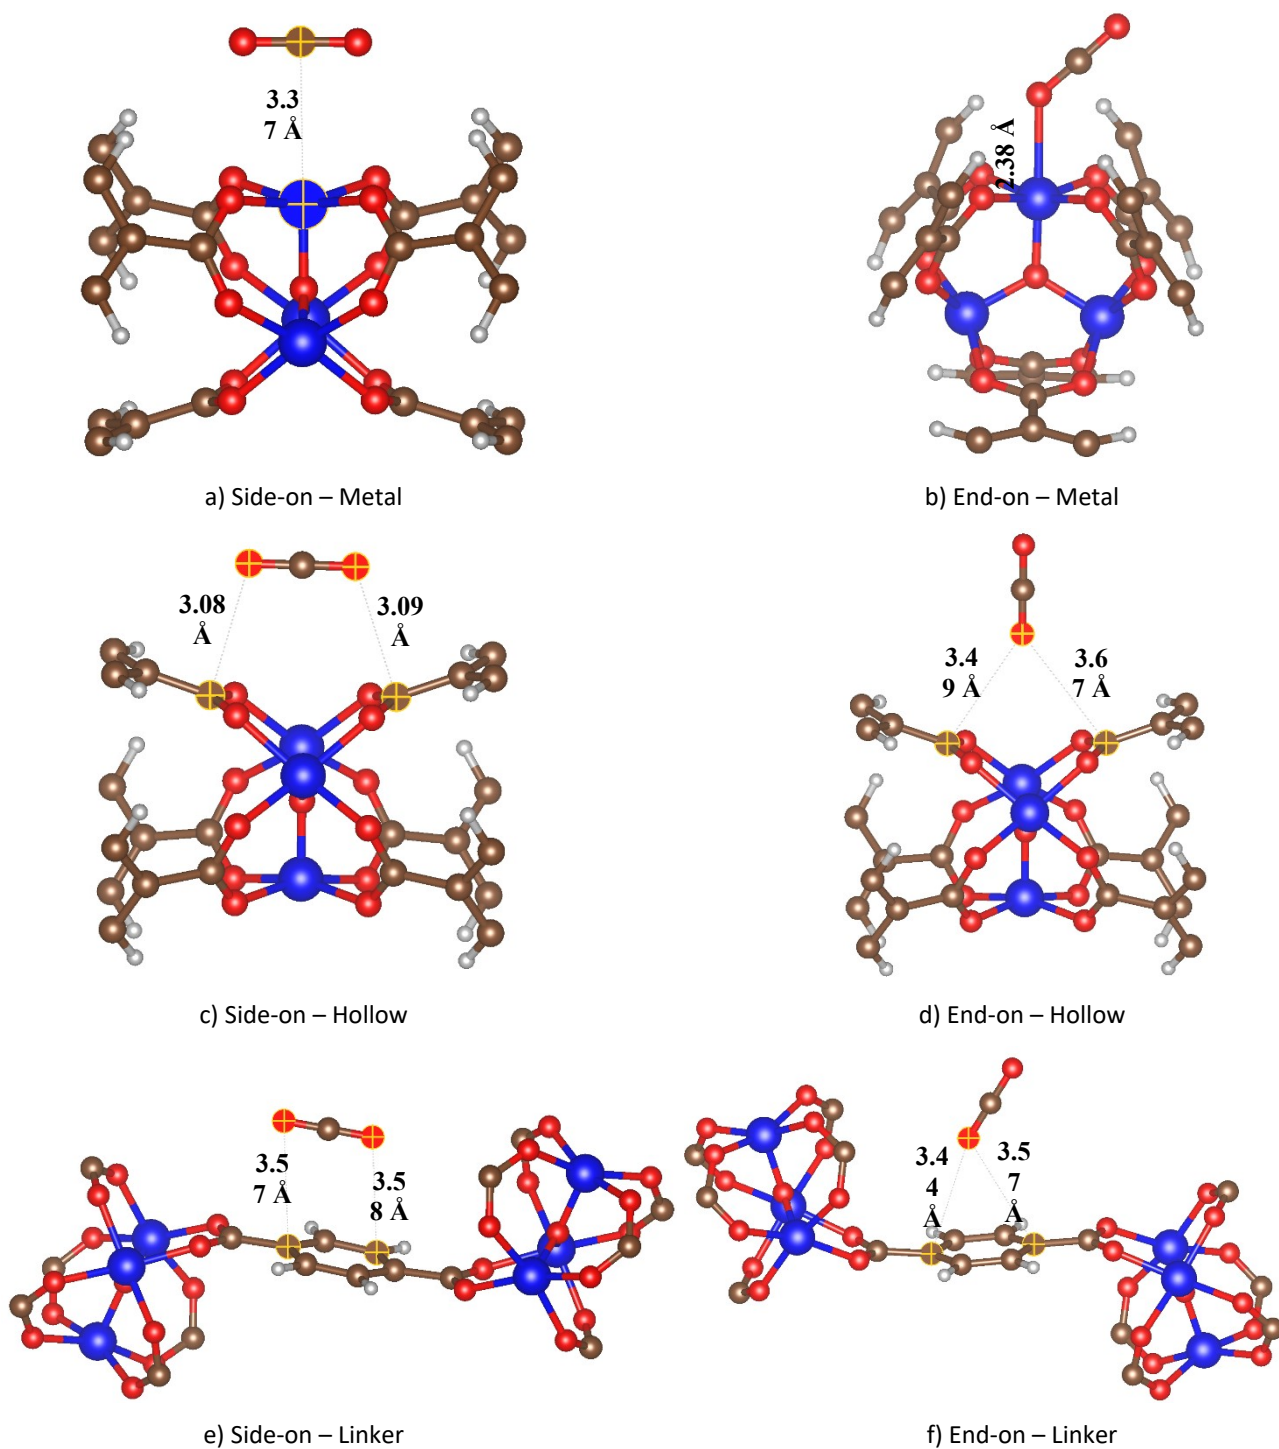

**Figure S1.** The favourable CO<sub>2</sub> adsorption sites in MIL-88B. Fe (blue), O (red), and C (brown), and H (light-grey).

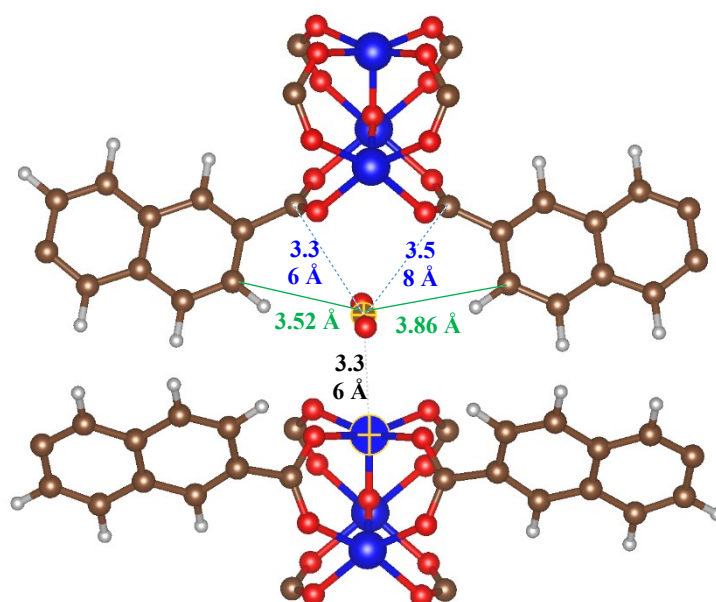

a) Side-on – Metal/ Side-on – Hollow

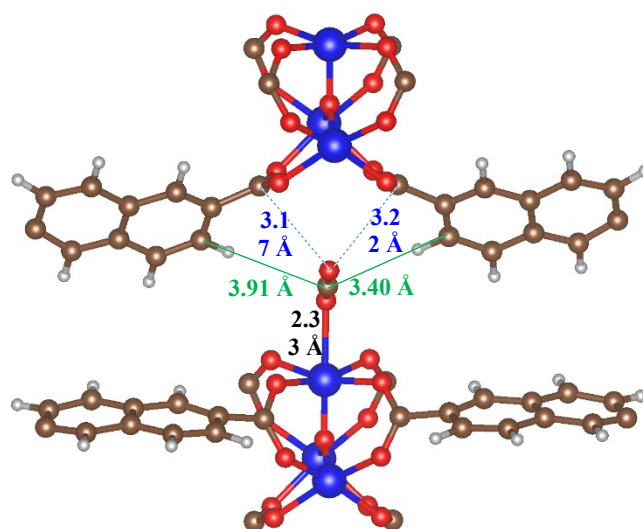

b) End-on – Metal/ End-on – Hollow

**Figure S2.** The favorable CO<sub>2</sub> adsorption sites in MIL-88C. Fe (blue), O (red), and C (brown), and H (light-gray).

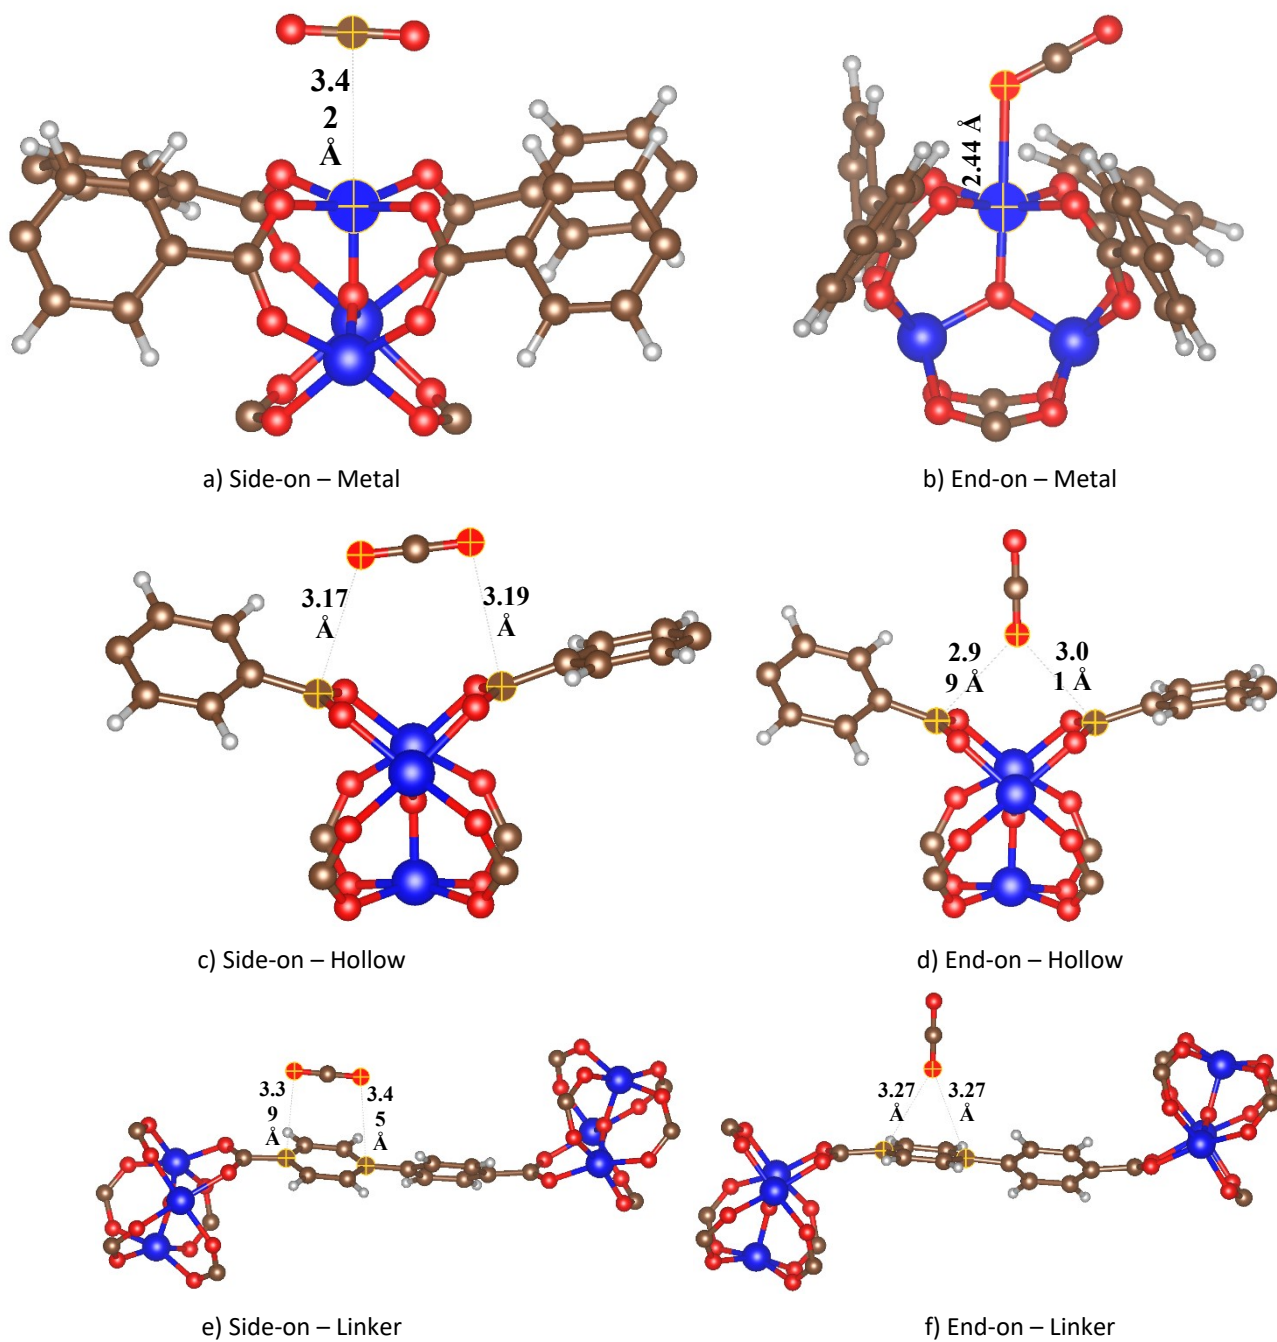

**Figure S3.** The favorable CO<sub>2</sub> adsorption sites in MIL-88D. Fe (blue), O (red), and C (brown), and H (light-gray).

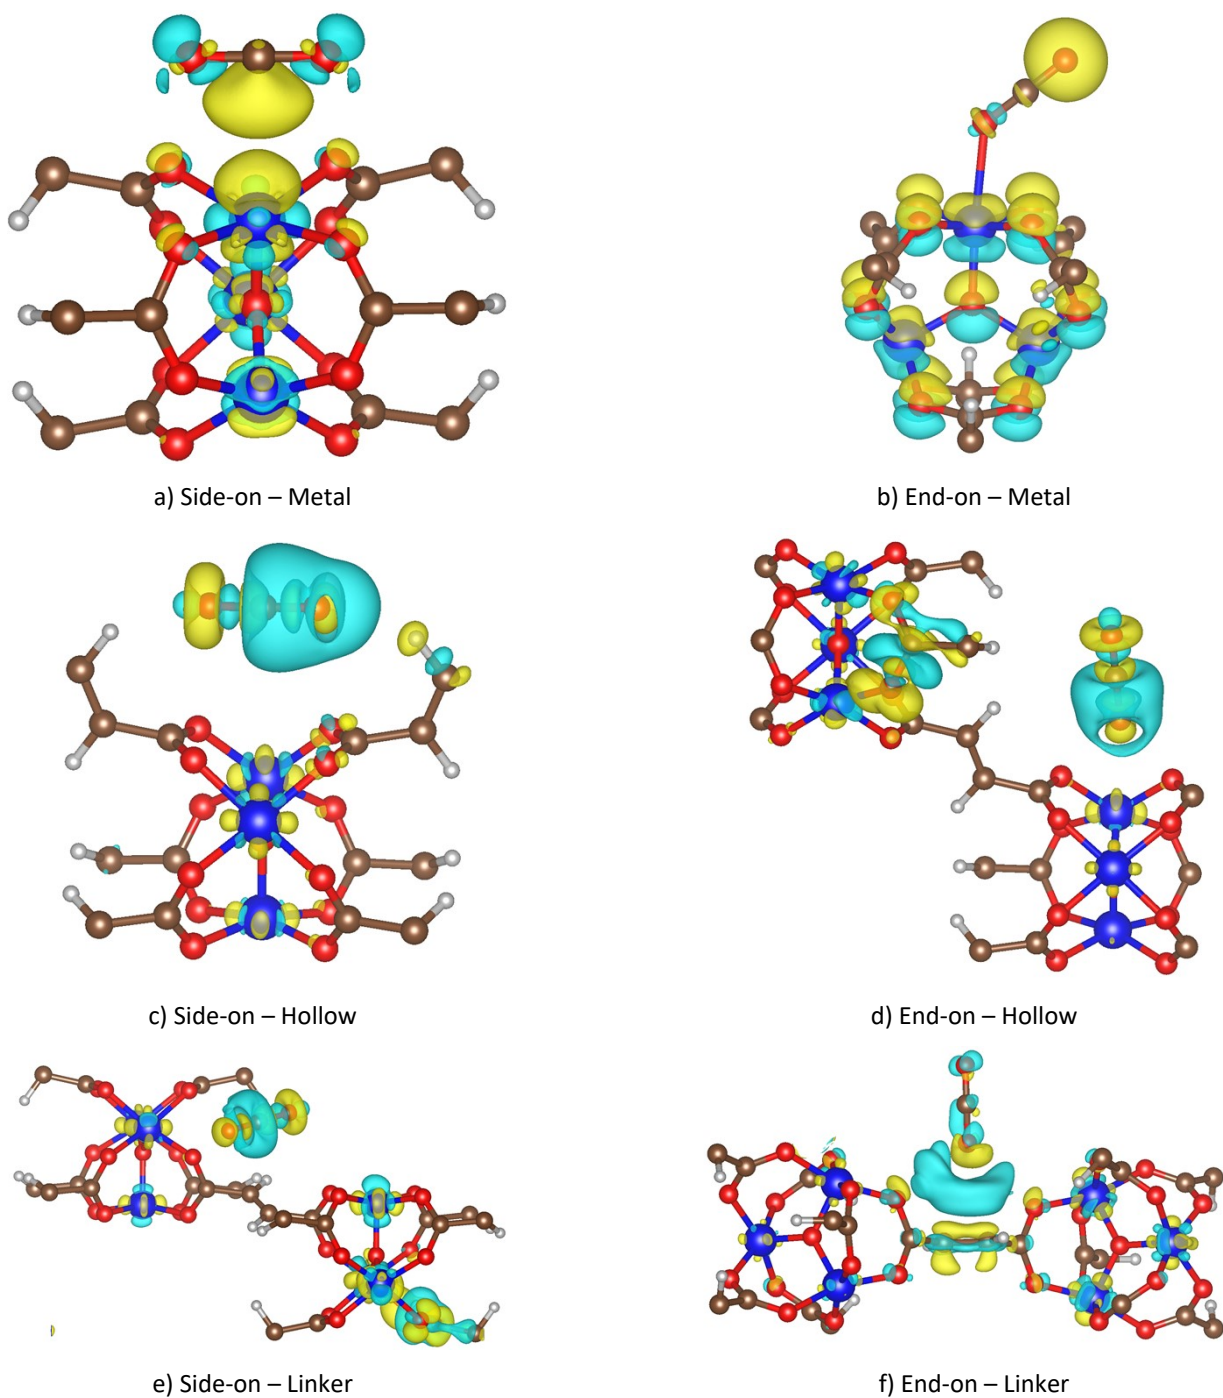

**Figure S4.** The charge density difference of the CO<sub>2</sub>@MIL-88A system with the different adsorption configurations and sites. Negative charge accumulation (yellow) and donation (cyan). Isosurface values ( $e^-/\text{bohr}^3$ ) for the charge density difference of the MIL-88A@CO<sub>2</sub> system at different sites are listed in Table S1.



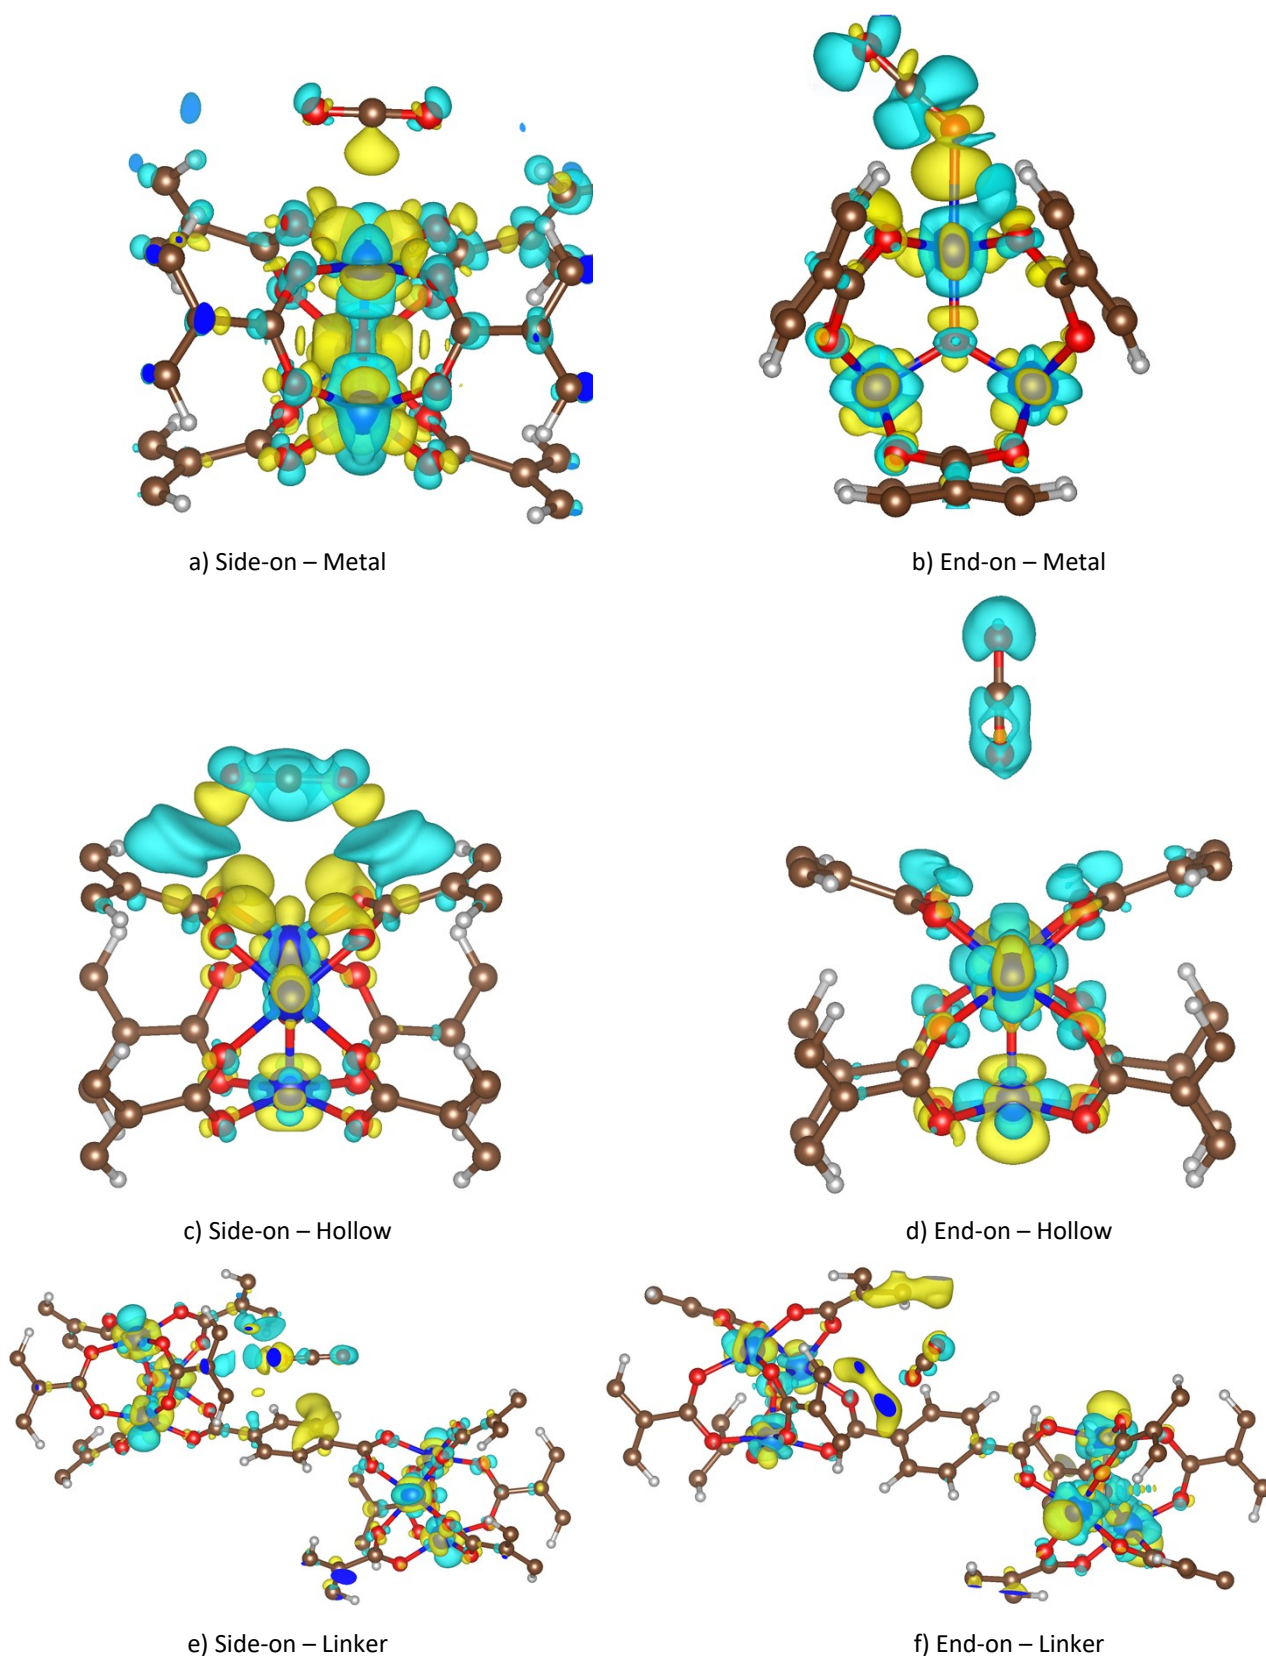

**Figure S5.** The charge density difference of the CO<sub>2</sub>@MIL-88B system with the different adsorption configurations and sites. Negative charge accumulation (yellow) and donation (cyan). Isosurface values ( $e^-/\text{bohr}^3$ ) for the charge density difference of the MIL-88B@CO<sub>2</sub> system at different sites are listed in Table S1.

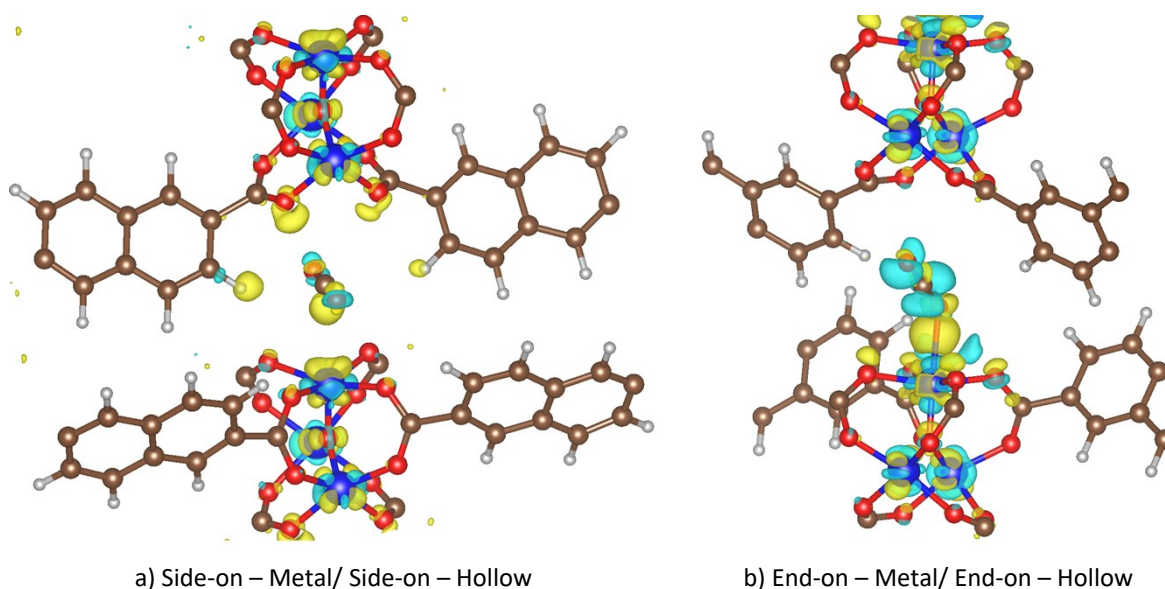

**Figure S6.** The charge density difference of the CO<sub>2</sub>@MIL-88C system with the different adsorption configurations and sites. Negative charge accumulation (yellow) and donation (cyan). Isosurface values ( $e^-/\text{bohr}^3$ ) for the charge density difference of the MIL-88C@CO<sub>2</sub> system at different sites are listed in Table S1.

**Table S1.** Isosurface values ( $e^-/\text{bohr}^3$ ) for the charge density difference of the MIL-88s@CO<sub>2</sub> systems.

| Site          | Configuration | MIL – 88A | MIL – 88B | MIL – 88C | MIL – 88D |
|---------------|---------------|-----------|-----------|-----------|-----------|
| <b>Metal</b>  | Side-on       | 0.0004    | 0.0005    | 0.0007    | 0.0003    |
|               | End-on        | 0.0350    | 0.0006    | 0.0010    | 0.0070    |
| <b>Hollow</b> | Side-on       | 0.0030    | 0.0002    | -         | 0.0080    |
|               | End-on        | 0.0050    | 0.0002    | -         | 0.0090    |
| <b>Linker</b> | Side-on       | 0.0050    | 0.0003    | -         | 0.0080    |
|               | End-on        | 0.0003    | 0.0004    | -         | 0.0050    |

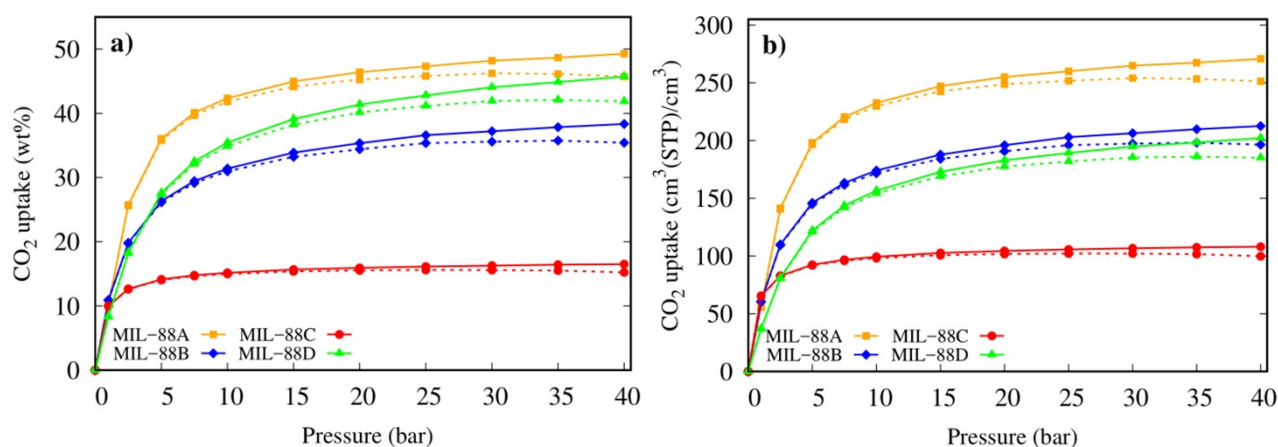

**Figure S7.** The excess (dashed line) and total (solid line) CO<sub>2</sub> adsorption isotherms of MIL-88A, B, C, and D in the presence of H<sub>2</sub>O at 298 K: a) gravimetric capacity and b) volumetric capacity.

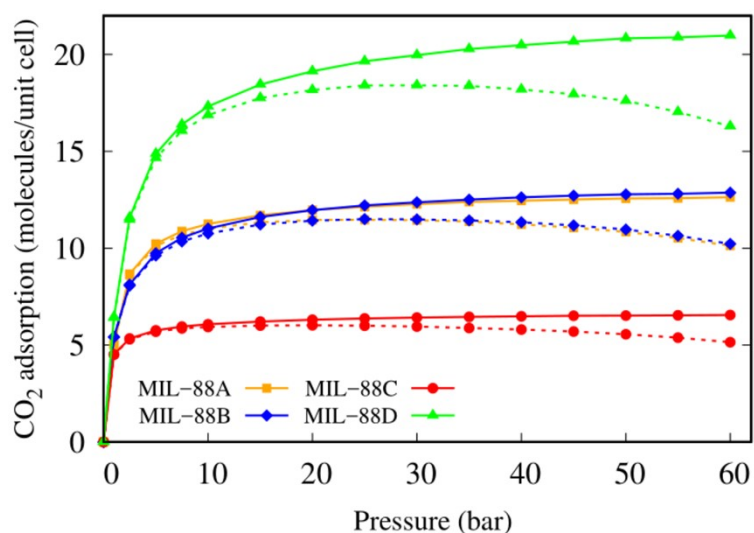

**Figure S8.** The excess (dashed line) and total (solid line) CO<sub>2</sub> adsorption isotherms of MIL-88A, B, C, and D in the unit of CO<sub>2</sub> molecules per unit cell.

**Table S2.** The excess and absolute capture capacities of CO<sub>2</sub> in MIL-88A, B, C, and D with and without H<sub>2</sub>O at 298 K.

| Adsorbent | Without H <sub>2</sub> O |                   |                                       |        | With H <sub>2</sub> O |                   |                                       |        |
|-----------|--------------------------|-------------------|---------------------------------------|--------|-----------------------|-------------------|---------------------------------------|--------|
|           | wt%                      |                   | cm <sup>3</sup> (STP)/cm <sup>3</sup> |        | wt%                   |                   | cm <sup>3</sup> (STP)/cm <sup>3</sup> |        |
|           | Total                    | Excess            | Total                                 | Excess | Total                 | Excess            | Total                                 | Excess |
| MIL-88A   | 52.10                    | 47.98<br>(25 bar) | 286.27                                | 263.61 | 49.28                 | 46.25<br>(30 bar) | 270.79                                | 254.10 |
| MIL-88B   | 41.10                    | 37.45<br>(25 bar) | 227.85                                | 207.60 | 38.34                 | 35.76<br>(35 bar) | 212.53                                | 198.22 |
| MIL-88C   | 17.27                    | 16.04<br>(20 bar) | 113.05                                | 104.98 | 16.50                 | 15.61<br>(25 bar) | 108.02                                | 102.18 |
| MIL-88D   | 49.83                    | 44.79<br>(30 bar) | 220.25                                | 197.97 | 45.73                 | 42.08<br>(35 bar) | 202.14                                | 186.03 |

Total uptakes were taken at 40 bar, while excess uptakes were taken at the pressure 25 bar.



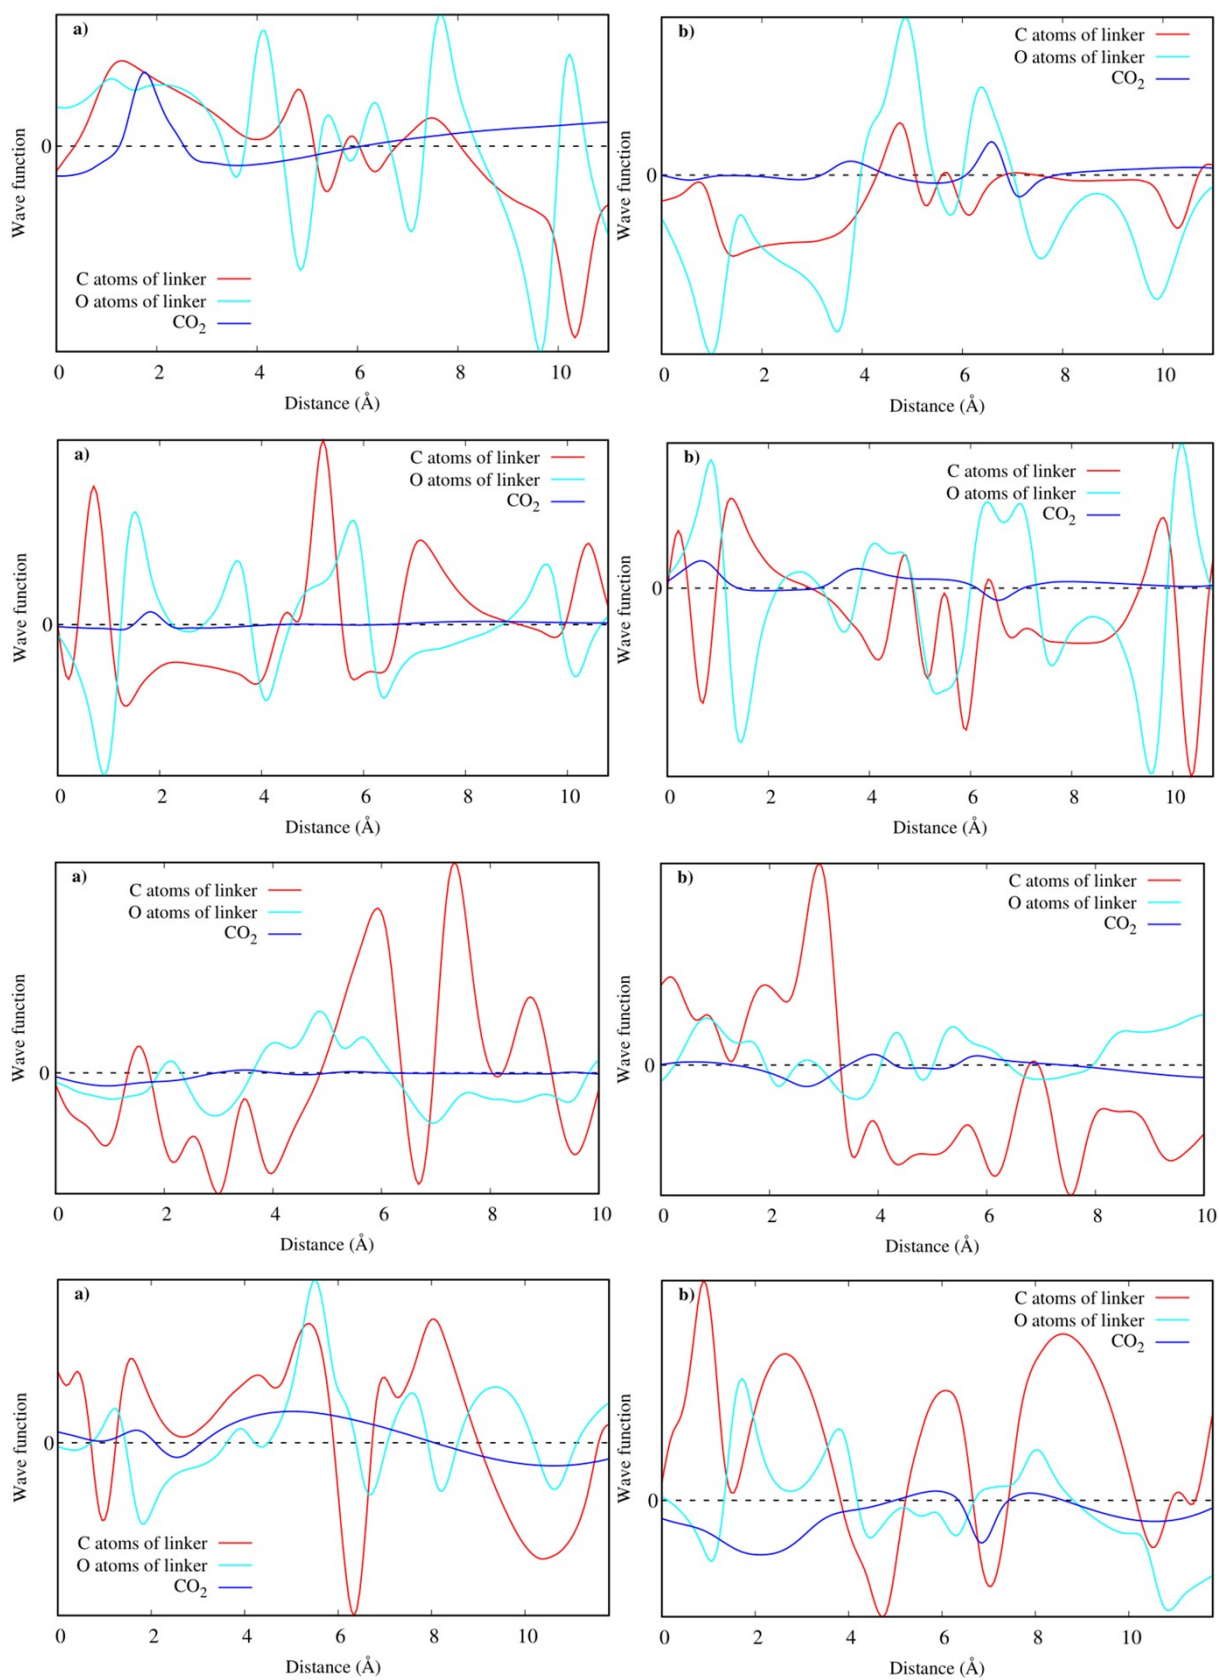

**Figure S9.** The real parts of the wavefunctions of the  $\text{CO}_2$  molecule and the C and O atoms of the organic linker of MIL-88A (first row), MIL-88B (second row), MIL-88C (third row), and MIL-88D (last row) along the  $x$  direction: a) metal site (end-on configuration) and b) hollow site (side-on configuration).
